# Supplementary material for: Stereospecific [3+2] cycloaddition of 1,2-cyclopropanated sugars and ketones catalyzed by SnCl4: an efficient synthesis of multi-substituted perhydrofuro[2,3-b]furans and perhydrofuro[2,3-b]pyrans
Source: Royal Society of Chemistry journal article supplement (doi:10.1039/c3cc48963a), 2014-01-01
Supplement: c3cc48963a1.pdf [file c3cc48963a1.pdf]

## SUPPORTING INFORMATION

### **Stereospecific [3+2] Cycloaddition of 1,2-Cyclopropanated Sugars and Ketones Catalyzed by SnCl<sub>4</sub>: an Efficient Synthesis of Multi-Substituted Perhydrofuro[2,3-*b*]furans and Perhydrofuro[2,3-*b*]pyrans**

**Xiaofeng Ma,<sup>a</sup> Jichao Zhang,<sup>a</sup> Qin Tang,<sup>a</sup> Jun Ke,<sup>a</sup> Wei Zou,<sup>b</sup> and Huawu Shao<sup>\*a</sup>**

<sup>a</sup> *Natural Products Research Center, Chengdu Institute of Biology,*

*Chinese Academy of Sciences, Chengdu, 610041, China*

<sup>b</sup> *Institute for Biological Sciences, National Research Council of Canada,*

*100 Sussex Drive, Ottawa, Ontario K1A 0R6.*

\*Correspondence author: E-mail: shaohw@cib.ac.cn

Fax: (+86) 28-82890288

## Table of contents

|                                                                              |         |
|------------------------------------------------------------------------------|---------|
| General Information-----                                                     | S3      |
| Preparation of Starting Materials-----                                       | S3      |
| Synthesis of Perhydrofuro[2,3- <i>b</i> ]pyran and Bis-THF Derivatives ----- | S4-S19  |
| Selected IR Data for the Products-----                                       | S19-S20 |
| The Stereochemistry of Products-----                                         | S20-S21 |

## 1. General

All reactions sensitive to air or moisture were carried out under nitrogen or argon atmosphere with anhydrous solvents. All reagents were purchased from commercial suppliers and used without further purification unless otherwise noted. Thin-layer chromatography was performed using silica gel GF254 precoated plates (0.20–0.25 mm thickness) with a fluorescent indicator. Visualization on TLC was achieved by UV light (254 nm) and a typical TLC indication solution (10% sulfuric acid / ethanol solution). Column chromatography was performed on silica gel 90, 200–300 mesh. Optical rotations were measured with a Perkin Elmer M341 Digital Polarimeter.  $^1\text{H}$  and  $^{13}\text{C}$  NMR (600 and 150 MHz, respectively) spectra were recorded on a Bruker Avance 600 spectrometer.  $^1\text{H}$  NMR chemical shifts are reported in ppm ( $\delta$ ) relative to tetramethylsilane (TMS) with the solvent resonance employed as the internal standard ( $\text{CDCl}_3$ ,  $\delta$  7.26 ppm;  $\text{CD}_3\text{COCD}_3$ ,  $\delta$  2.05 ppm). Data are reported as follows: chemical shift, multiplicity (s = singlet, d = doublet, t = triplet, q = quartet, m = multiplet), coupling constants (Hz) and integration.  $^{13}\text{C}$  NMR chemical shifts are reported in ppm from tetramethylsilane (TMS) with the solvent resonance as the internal standard ( $\text{CDCl}_3$ ,  $\delta$  77.0 ppm;  $\text{CD}_3\text{COCD}_3$ ,  $\delta$  39.5). HRESIMS spectra were recorded on BioTOFQ.

### **Preparation of Starting Materials:**

1-*C*-Acetyl-3,4,6-tri-*O*-benzyl-1,2-cyclopropane-1,2-deoxy- $\alpha$ -D-galactopyranose (**1a**), 1-*C*-Acetyl-3,4,6-tri-*O*-benzyl-1,2-cyclopropane-1,2-deoxy- $\alpha$ -D-glucopyranose (**1b**) and 1-*C*-Acetyl-3,4-Di-*O*-benzyl-1,2-cyclopropane-1,2-deoxy- $\alpha$ -D-lyxofuranose (**1c**) were obtained as our previously reported methods.

### **General procedure for $\text{SnCl}_4$ -catalyzed transformation for cyclopropanated sugars to per-substituted perhydrofuro[2,3-*b*]pyran and furan derivatives.**

**Method A:** Under an argon atmosphere,  $\text{SnCl}_4$  (2.3  $\mu\text{L}$ , 0.02 mmol) in 0.5 mL  $\text{CH}_2\text{Cl}_2$  was added to a mixture of 4  $\text{\AA}$  M.S. (50 mg), cyclopropanated sugars **1** (0.1 mmol) and ketones **2** (0.4 mmol)



1.42 (s, 3H);  $^{13}\text{C}$  NMR (150 MHz,  $\text{CDCl}_3$ )  $\delta$  208.1, 148.5, 138.5, 137.9, 137.9, 128.7, 128.5, 128.3, 128.1, 128.0, 127.8, 127.7, 127.6, 126.9, 124.1, 101.2, 82.0, 78.2, 74.0, 73.6, 72.1, 71.4, 70.2, 68.6, 62.8, 43.9, 32.1, 29.7, 27.5; ESI-HRMS:  $m/z$  calcd for  $\text{C}_{38}\text{H}_{40}\text{NaO}_6[\text{M}+\text{Na}]^+$ : 615.2717; found: 615.2714.

**(2*S*,3*S*,3*aR*,4*R*,5*R*,6*R*,7*aS*)-3-acetyl-4,5-bis(benzyloxy)-6-[(benzyloxy)methyl]-2-methyl-2-(4-tolyl)hexahydrofuro[2,3-*b*]pyran (3ab)**

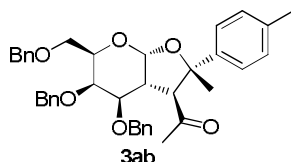

Compound **3ab** was prepared according to Method A using (47.3 mg, 0.1 mmol) cyclopropanated sugars **1a** and ketone **2b** (56.2  $\mu\text{L}$ , 0.4 mmol), after purified by column chromatography on silica gel (ethyl acetate/ petroleum ether = 1:9), afforded the desired product **3ab** (53.4 mg, 0.088 mmol, 88%) as colorless syrup.  $[\alpha]_{\text{D}}^{20} +68.2$  ( $c$  0.24,  $\text{CHCl}_3$ );  $^1\text{H}$  NMR (600 MHz,  $\text{CDCl}_3$ )  $\delta$  7.36 – 7.26 (m, 15H), 7.12 (d,  $J$  = 7.9 Hz, 2H), 7.09 (s, 2H), 5.84 (d,  $J$  = 4.3 Hz, 1H), 4.80 (d,  $J$  = 11.7 Hz, 1H), 4.55 (d,  $J$  = 11.7 Hz, 1H), 4.52 (d,  $J$  = 11.7 Hz, 1H), 4.47 (d,  $J$  = 11.7 Hz, 1H), 4.39 (d,  $J$  = 11.8 Hz, 1H), 4.06 (t,  $J$  = 6.7 Hz, 1H), 3.97 (d,  $J$  = 11.8 Hz, 1H), 3.82 (s, 1H), 3.67 (d,  $J$  = 6.5 Hz, 2H), 3.47 (s, 1H), 3.11 (dd,  $J$  = 9.8, 1.3 Hz, 1H), 2.79 – 2.77 (m, 1H), 2.36 (s, 3H), 2.26 (s, 3H);  $^{13}\text{C}$  NMR (150 MHz,  $\text{CDCl}_3$ )  $\delta$  208.2, 145.5, 138.5, 137.9, 137.8, 136.4, 129.3, 128.5, 128.4, 128.3, 128.1, 128.0, 127.8, 127.7, 127.6, 124.0, 101.1, 82.1, 78.1, 73.9, 73.6, 72.1, 71.3, 70.2, 68.6, 62.9, 43.9, 32.1, 29.7, 27.5, 21.0; ESI-HRMS:  $m/z$  calcd for  $\text{C}_{39}\text{H}_{42}\text{NaO}_6[\text{M}+\text{Na}]^+$ : 629.2874; found: 629.2862.

**(2*S*,3*S*,3*aR*,4*R*,5*R*,6*R*,7*aS*)-3-acetyl-4,5-bis(benzyloxy)-6-[(benzyloxy)methyl]-2-methyl-2-(4-chlorophenyl)hexahydrofuro[2,3-*b*]pyran (3ac)**

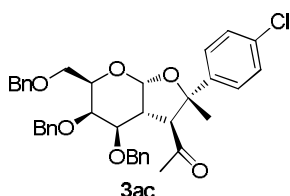

Compound **3ac** was prepared according to Method A using (47.3 mg, 0.1 mmol) cyclopropanated sugars **1a** and ketone **2c** (53.5  $\mu\text{L}$ , 0.4 mmol), after purified by column chromatography on silica gel (ethyl acetate/ petroleum ether = 1:9), afforded the desired product **3ac** (52.0 mg, 0.083 mmol,

83%) as colorless syrup.  $[\alpha]_D^{20} +62.4$  ( $c$  0.19,  $\text{CHCl}_3$ );  $^1\text{H}$  NMR (600 MHz,  $\text{CDCl}_3$ )  $\delta$  7.38 – 7.22 (m, 17H), 7.07 (d,  $J = 7.4$  Hz, 2H), 5.80 (d,  $J = 4.4$  Hz, 1H), 4.81 (d,  $J = 11.7$  Hz, 1H), 4.56 (d,  $J = 11.7$  Hz, 1H), 4.52 (d,  $J = 11.7$  Hz, 1H), 4.48 (d,  $J = 11.8$  Hz, 1H), 4.44 (d,  $J = 12.1$  Hz, 1H), 4.01 (dd,  $J = 16.0, 9.2$  Hz, 2H), 3.86 (s, 1H), 3.67 (d,  $J = 6.2$  Hz, 2H), 3.30 (d,  $J = 1.7$  Hz, 1H), 3.02 (dd,  $J = 10.0, 1.7$  Hz, 1H), 2.76 (ddd,  $J = 6.4, 4.0, 2.0$  Hz, 1H), 2.25 (s, 3H), 1.36 (s, 3H);  $^{13}\text{C}$  NMR (150 MHz,  $\text{CDCl}_3$ )  $\delta$  207.7, 146.8, 138.4, 137.8, 137.5, 132.6, 128.8, 128.5, 128.5, 128.3, 128.1, 128.0, 128.0, 127.9, 127.8, 127.7, 125.5, 101.0, 81.6, 77.5, 74.0, 73.7, 72.2, 70.7, 69.9, 68.5, 62.9, 43.9, 31.9, 29.7, 27.2; ESI-HRMS:  $m/z$  calcd for  $\text{C}_{38}\text{H}_{39}\text{ClNaO}_6[\text{M}+\text{Na}]^+$ : 649.2333; found: 649.2325.

**(2*S*,3*S*,3*aR*,4*R*,5*R*,6*R*,7*aS*)-3-acetyl-4,5-bis(benzyloxy)-6-[(benzyloxy)methyl]-2-methyl-2-(4-bromophenyl)hexahydrofuro[2,3-*b*]pyran (3ad)**

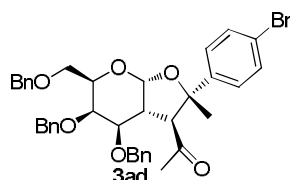

Compound **3ad** was prepared according to Method A using (47.3 mg, 0.1 mmol) cyclopropanated sugars **1a** and ketone **2d** (81.2 mg, 0.4 mmol), after purified by column chromatography on silica gel (ethyl acetate/ petroleum ether = 1:9), afforded the desired product **3ad** (53.6 mg, 0.080 mmol, 80%) as colorless syrup.  $[\alpha]_D^{20} +80.2$  ( $c$  0.19,  $\text{CHCl}_3$ );  $^1\text{H}$  NMR (600 MHz,  $\text{CDCl}_3$ )  $\delta$  7.40 – 7.25 (m, 15H), 7.20 (d,  $J = 8.6$  Hz, 2H), 7.09 – 7.05 (m, 2H), 5.80 (d,  $J = 4.4$  Hz, 1H), 4.81 (d,  $J = 11.7$  Hz, 1H), 4.57 (d,  $J = 11.7$  Hz, 1H), 4.52 (d,  $J = 11.8$  Hz, 1H), 4.48 (d,  $J = 11.7$  Hz, 1H), 4.44 (d,  $J = 12.1$  Hz, 1H), 4.00 (dd,  $J = 12.7, 7.7$  Hz, 2H), 3.86 (s, 1H), 3.67 (dd,  $J = 11.7, 5.6$  Hz, 2H), 3.29 (d,  $J = 1.9$  Hz, 1H), 3.01 (dd,  $J = 10.0, 2.1$  Hz, 1H), 2.76 (ddd,  $J = 9.9, 4.3, 2.2$  Hz, 1H), 2.28 (s, 3H), 1.38 (s, 3H);  $^{13}\text{C}$  NMR (150 MHz,  $\text{CDCl}_3$ )  $\delta$  207.7, 147.4, 138.4, 137.8, 137.5, 131.7, 128.5, 128.5, 128.3, 128.1, 128.0, 128.0, 127.9, 127.9, 127.7, 125.8, 120.8, 101.1, 81.6, 77.4, 74.0, 73.7, 72.2, 70.7, 69.9, 68.5, 62.8, 43.9, 32.0, 29.7, 27.2; ESI-HRMS:  $m/z$  calcd for  $\text{C}_{38}\text{H}_{39}\text{BrNaO}_6[\text{M}+\text{Na}]^+$ : 693.1822; found: 693.1848.

**(2*S*,3*S*,3*aR*,4*R*,5*R*,6*R*,7*aS*)-3-acetyl-4,5-bis(benzyloxy)-6-[(benzyloxy)methyl]-2-methyl-2-(4-trifluoromethylphenyl)hexahydrofuro[2,3-*b*]pyran (3ae)**

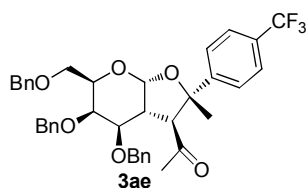

Compound **3ae** was prepared according to Method A using (47.3 mg, 0.1 mmol) cyclopropanated sugars **1a** and ketone **2e** (76.8 mg, 0.4 mmol), after purified by column chromatography on silica gel (ethyl acetate/ petroleum ether = 1: 9), afforded the desired product **3ae** (42.9 mg, 0.065 mmol, 65%) as colorless syrup.  $[\alpha]_D^{20} +61.4$  ( $c$  0.24,  $\text{CHCl}_3$ );  $^1\text{H}$  NMR (600 MHz,  $\text{CDCl}_3$ )  $\delta$  7.52 (d,  $J$  = 8.2 Hz, 2H), 7.42 (d,  $J$  = 8.2 Hz, 2H), 7.38 – 7.34 (m, 2H), 7.31 (dd,  $J$  = 10.1, 5.9 Hz, 8H), 7.24 – 7.19 (m, 3H), 7.04 (d,  $J$  = 6.5 Hz, 2H), 5.82 (d,  $J$  = 4.4 Hz, 1H), 4.82 (d,  $J$  = 11.7 Hz, 1H), 4.57 (d,  $J$  = 11.7 Hz, 1H), 4.53 (d,  $J$  = 11.7 Hz, 1H), 4.48 (d,  $J$  = 11.7 Hz, 1H), 4.43 (d,  $J$  = 12.2 Hz, 1H), 4.02 (t,  $J$  = 6.6 Hz, 1H), 3.97 (d,  $J$  = 12.2 Hz, 1H), 3.87 (s, 1H), 3.68 (d,  $J$  = 6.4 Hz, 2H), 3.29 (d,  $J$  = 1.8 Hz, 1H), 2.95 (dd,  $J$  = 10.0, 2.1 Hz, 1H), 2.80 – 2.74 (m, 1H), 2.28 (s, 3H), 1.38 (s, 3H);  $^{13}\text{C}$  NMR (150 MHz,  $\text{CDCl}_3$ )  $\delta$  207.6, 152.1, 138.3, 137.8, 137.4, 128.9, 128.6, 128.5, 128.4, 128.3, 128.1, 128.1, 128.0, 127.9, 127.8, 127.7, 125.7, 124.4, 101.1, 81.6, 77.3, 74.1, 73.7, 72.2, 70.5, 69.8, 68.5, 62.7, 44.0, 32.0, 29.7, 27.3; ESI-HRMS:  $m/z$  calcd for  $\text{C}_{39}\text{H}_{39}\text{F}_3\text{NaO}_6[\text{M}+\text{Na}]^+$ : 683.2591; found: 683.2604.

**(2*S*,3*S*,3*aR*,4*R*,5*R*,6*R*,7*aS*)-3-acetyl-4,5-bis(benzyloxy)-6-[(benzyloxy)methyl]-2-ethyl-2-phenylhexahydrofuro[2,3-*b*]pyran (3af)**

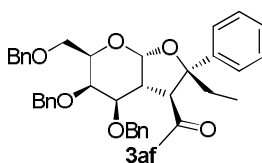

Compound **3af** was prepared according to Method A using (47.3 mg, 0.1 mmol) cyclopropanated sugars **1a** and ketone **2f** (54.3  $\mu\text{L}$ , 0.4 mmol), after purified by column chromatography on silica gel (ethyl acetate/ petroleum ether = 1:9), afforded the desired product **3af** (47.4 mg, 0.080 mmol, 80%) as colorless syrup.  $[\alpha]_D^{20} +51.5$  ( $c$  0.20,  $\text{CHCl}_3$ );  $^1\text{H}$  NMR (600 MHz,  $\text{CDCl}_3$ )  $\delta$  7.39 – 7.27 (m, 13H), 7.25 – 7.22 (m, 4H), 7.04 (s, 2H), 5.82 (d,  $J$  = 4.3 Hz, 1H), 4.80 (d,  $J$  = 11.7 Hz, 1H), 4.53 (d,  $J$  = 11.7 Hz, 1H), 4.50 (s, 1H), 4.46 (d,  $J$  = 11.7 Hz, 1H), 4.33 (d,  $J$  = 11.7 Hz, 1H), 4.09 (t,  $J$  = 6.6 Hz, 1H), 3.86 (d,  $J$  = 11.7 Hz, 1H), 3.79 (s, 1H), 3.69 – 3.65 (m, 2H), 3.49 (s, 1H), 3.08 (d,  $J$  = 10.4 Hz, 1H), 2.72 (dd,  $J$  = 10.3, 4.3 Hz, 1H), 2.30 (s, 3H), 0.88 (t,  $J$  = 5.8 Hz, 2H), 0.60 (t,  $J$  =

7.2 Hz, 3H);  $^{13}\text{C}$  NMR (150 MHz,  $\text{CDCl}_3$ )  $\delta$  208.5, 146.1, 138.5, 137.9, 137.7, 128.4, 128.3, 128.1, 128.1, 127.9, 127.8, 127.7, 127.6, 126.7, 124.8, 101.5, 84.8, 78.3, 74.0, 73.7, 72.1, 71.5, 70.2, 68.7, 63.6, 43.6, 32.4, 31.4, 29.7, 8.4; ESI-HRMS:  $m/z$  calcd for  $\text{C}_{39}\text{H}_{42}\text{NaO}_6[\text{M}+\text{Na}]^+$ : 629.2874; found: 629.2854.

**(2*S*,3*S*,3*aR*,4*R*,5*R*,6*R*,7*aS*)-3-acetyl-4,5-bis(benzyloxy)-6-[(benzyloxy)methyl]-2-methyl-2-(furan-2-yl)hexahydrofuro[2,3-*b*]pyran (3ag)**

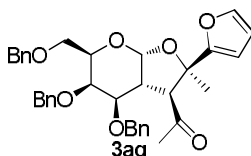

Compound **3ag** was prepared according to Method A using (47.3 mg, 0.1 mmol) cyclopropanated sugars **1a** and ketone **2g** (44.5 mg, 0.4 mmol), after purified by column chromatography on silica gel (ethyl acetate/ petroleum ether = 1:9), afforded the desired product **3ag** (46.0 mg, 0.079 mmol, 79%) as colorless syrup.  $[\alpha]_{\text{D}}^{20} +88.0$  ( $c$  0.14,  $\text{CHCl}_3$ );  $^1\text{H}$  NMR (600 MHz,  $\text{CDCl}_3$ )  $\delta$  7.35 – 7.24 (m, 16H), 6.28 (dd,  $J$  = 3.1, 1.8 Hz, 1H), 6.19 (d,  $J$  = 3.2 Hz, 1H), 5.65 (d,  $J$  = 4.5 Hz, 1H), 4.85 (d,  $J$  = 11.7 Hz, 1H), 4.60 (d,  $J$  = 11.7 Hz, 2H), 4.49 (d,  $J$  = 11.8 Hz, 1H), 4.46 (d,  $J$  = 11.8 Hz, 1H), 4.26 (d,  $J$  = 12.0 Hz, 1H), 4.06 (t,  $J$  = 6.8 Hz, 1H), 3.96 (s, 1H), 3.68 (t,  $J$  = 8.6 Hz, 1H), 3.63 (dd,  $J$  = 9.0, 5.5 Hz, 1H), 3.55 (s, 1H), 3.48 (dd,  $J$  = 9.7, 1.9 Hz, 1H), 2.90 – 2.85 (m, 1H), 2.12 (s, 3H), 1.42 (s, 3H);  $^{13}\text{C}$  NMR (150 MHz,  $\text{CDCl}_3$ )  $\delta$  207.0, 157.7, 142.1, 138.5, 138.0, 137.9, 128.5, 128.4, 128.3, 128.0, 127.8, 127.8, 127.6, 110.3, 105.3, 100.9, 78.5, 77.7, 73.9, 73.6, 72.1, 71.1, 70.1, 68.4, 60.4, 43.1, 31.9, 29.7, 23.0; ESI-HRMS:  $m/z$  calcd for  $\text{C}_{36}\text{H}_{38}\text{NaO}_7[\text{M}+\text{Na}]^+$ : 605.2510; found: 605.2516.

**Spirocyclic compound 3ah**

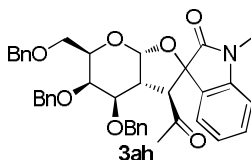

Compound **3ah** was prepared according to Method A using (47.3 mg, 0.1 mmol) cyclopropanated sugars **1a** and ketone **2h** (64.5 mg, 0.4 mmol), after purified by column chromatography on silica gel (ethyl acetate/ petroleum ether = 1:10), afforded the desired product **3ah** (45.0 mg, 0.071 mmol, 71%) as light red syrup.  $[\alpha]_{\text{D}}^{20} +163.0$  ( $c$  0.32,  $\text{CHCl}_3$ );  $^1\text{H}$  NMR (600 MHz,  $\text{CDCl}_3$ )  $\delta$  7.60



(d,  $J = 7.5$  Hz, 1H), 7.52 (t,  $J = 7.7$  Hz, 1H), 7.35 – 7.29 (m, 15H), 6.83 (t,  $J = 7.4$  Hz, 1H), 6.74 (d,  $J = 8.3$  Hz, 1H), 5.99 (d,  $J = 4.5$  Hz, 1H), 4.89 (d,  $J = 11.6$  Hz, 1H), 4.78 (d,  $J = 11.7$  Hz, 1H), 4.62 (d,  $J = 11.6$  Hz, 1H), 4.59 (d,  $J = 11.7$  Hz, 1H), 4.53 – 4.49 (m, 1H), 4.46 (d,  $J = 11.9$  Hz, 1H), 4.28 (d,  $J = 8.4$  Hz, 1H), 4.18 (t,  $J = 6.5$  Hz, 1H), 4.04 (s, 1H), 3.68 – 3.60 (m, 2H), 3.46 (d,  $J = 2.5$  Hz, 1H), 3.16 – 3.11 (m, 1H), 2.76 (s, 3H), 1.92 (s, 3H);  $^{13}\text{C}$  NMR (150 MHz,  $\text{CDCl}_3$ )  $\delta$  204.3, 198.6, 162.5, 138.8, 138.6, 138.3, 138.0, 128.5, 128.4, 128.3, 128.0, 127.9, 127.83, 127.8, 127.7, 127.6, 125.3, 119.4, 118.8, 110.2, 103.7, 94.9, 77.7, 74.0, 73.4, 72.4, 71.7, 70.5, 68.4, 58.7, 42.3, 31.2, 29.7, 29.6; ESI-HRMS:  $m/z$  calcd for  $\text{C}_{39}\text{H}_{39}\text{NNaO}_7[\text{M}+\text{Na}]^+$ : 656.2619; found: 656.2625.

### Spirocyclic compound **3ai**

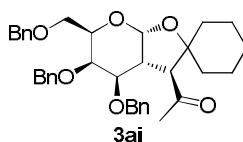

Compound **3ai** was prepared according to Method A using (47.3 mg, 0.1 mmol) cyclopropanated sugars **1a** and ketone **2i** (41.9  $\mu\text{L}$ , 0.4 mmol), after purified by column chromatography on silica gel (ethyl acetate/ petroleum ether = 1:9), afforded the desired product **3ai** (50.2 mg, 0.088 mmol, 88%) as colorless syrup.  $[\alpha]_{\text{D}}^{20} +56$  ( $c$  0.40,  $\text{CHCl}_3$ );  $^1\text{H}$  NMR (600 MHz,  $\text{CDCl}_3$ )  $\delta$  7.40 – 7.25 (m, 15H), 5.44 (d,  $J = 4.4$  Hz, 1H), 4.86 (d,  $J = 11.7$  Hz, 1H), 4.67 (d,  $J = 12.1$  Hz, 1H), 4.62 (d,  $J = 11.7$  Hz, 1H), 4.50 (d,  $J = 11.8$  Hz, 1H), 4.47 (d,  $J = 11.8$  Hz, 1H), 4.34 (d,  $J = 12.1$  Hz, 1H), 4.05 (t,  $J = 5.9$  Hz, 1H), 4.01 (s, 1H), 3.73 – 3.63 (m, 2H), 3.35 (dd,  $J = 9.4, 1.9$  Hz, 1H), 2.74 (dt,  $J = 9.5, 4.0$  Hz, 1H), 2.66 (d,  $J = 3.7$  Hz, 1H), 2.12 (s, 3H), 1.60 (dd,  $J = 16.9, 7.8$  Hz, 4H), 1.48 (d,  $J = 13.0$  Hz, 1H), 1.40 (s, 2H), 1.34 (td,  $J = 12.9, 3.8$  Hz, 1H), 1.15 – 1.05 (m, 1H), 0.97 (t,  $J = 11.3$  Hz, 1H);  $^{13}\text{C}$  NMR (150 MHz,  $\text{CDCl}_3$ )  $\delta$  = 207.5, 138.5, 138.0, 137.8, 128.5, 128.4, 128.4, 128.3, 128.1, 128.0, 128.0, 127.8, 127.6, 99.7, 80.5, 78.6, 73.8, 73.6, 72.2, 70.5, 70.0, 68.3, 63.3, 43.8, 40.6, 33.0, 32.2, 25.1, 23.0, 22.2; ESI-HRMS:  $m/z$  calcd for  $\text{C}_{36}\text{H}_{42}\text{NaO}_6[\text{M}+\text{Na}]^+$ : 593.2874; found: 593.2873.

### (3*S*,3*aR*,4*R*,5*R*,6*R*,7*aS*)-3-acetyl-4,5-bis(benzyloxy)-6-[(benzyloxy)methyl]-2,2-di-methylhexahydrofuro[2,3-*b*]pyran (**3aj**)

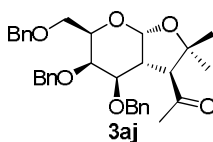

Compound **3aj** was prepared according to Method B using (47.3 mg, 0.1 mmol) cyclopropanated sugars **1a** and acetone **2j** (74.2  $\mu$ L, 1.0 mmol), after purified by column chromatography on silica gel (ethyl acetate/ petroleum ether = 1: 6), afforded the desired product **3aj** (49.3 mg, 0.093 mmol, 93%) as colorless syrup.  $[\alpha]_D^{20} +48.5$  ( $c$  0.46,  $\text{CHCl}_3$ );  $^1\text{H}$  NMR (600 MHz,  $\text{CDCl}_3$ )  $\delta$  7.39 – 7.27(m, 15H), 5.43 (d,  $J$  = 4.4 Hz, 1H), 4.85 (d,  $J$  = 11.7 Hz, 1H), 4.68 (d,  $J$  = 12.1 Hz, 1H), 4.63 (d,  $J$  = 11.7 Hz, 1H), 4.51 (d,  $J$  = 11.8 Hz, 1H), 4.48 (d,  $J$  = 11.8 Hz, 1H), 4.35 (d,  $J$  = 12.1 Hz, 1H), 4.04 (t,  $J$  = 6.7 Hz, 1H), 4.01 (s, 1H), 3.70 (t,  $J$  = 8.4 Hz, 1H), 3.65 (dd,  $J$  = 9.3, 5.9 Hz, 1H), 3.37 (dd,  $J$  = 9.2, 1.9 Hz, 1H), 2.84 (dt,  $J$  = 9.0, 4.4 Hz, 1H), 2.76 (d,  $J$  = 4.3 Hz, 1H), 2.10 (s, 3H), 1.25 (s, 3H), 1.07 (s, 3H);  $^{13}\text{C}$  NMR (150 MHz,  $\text{CDCl}_3$ )  $\delta$  207.0, 138.5, 138.0, 137.8, 128.6, 128.4, 128.4, 128.3, 128.1, 128.0, 127.7, 127.6, 99.6, 79.0, 78.5, 73.8, 73.5, 72.5, 70.5, 70.1, 68.2, 63.0, 44.1, 31.6, 31.3, 24.8; ESI-HRMS:  $m/z$  calcd for  $\text{C}_{33}\text{H}_{38}\text{NaO}_6[\text{M}+\text{Na}]^+$ : 553.2561; found: 553.2551.

**(2R,3S,3aR,4R,5R,6R,7aS)-3-acetyl-4,5-bis(benzyloxy)-6-[(benzyloxy)methyl]-2-ethyl-2-methylhexahydrofuro[2,3-b]pyran (3ak)**

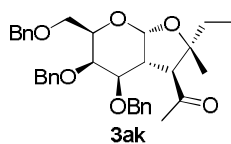

Compound **3ak** was prepared according to Method A using (47.3 mg, 0.1 mmol) cyclopropanated sugars **1a** and 2-butanone **2k** (36.2  $\mu$ L, 0.4 mmol), after purified by column chromatography on silica gel (ethyl acetate/ petroleum ether = 1:6), afforded the desired product **3ak** (44.1 mg, 0.081 mmol, 81%) as colorless syrup.  $[\alpha]_D^{20} +40.9$  ( $c$  0.25,  $\text{CHCl}_3$ );  $^1\text{H}$  NMR (600 MHz,  $\text{CDCl}_3$ )  $\delta$  7.39 – 7.27 (m, 15H), 5.45 (d,  $J$  = 4.5 Hz, 1H), 4.86 (d,  $J$  = 11.7 Hz, 1H), 4.67 (d,  $J$  = 12.2 Hz, 1H), 4.63 (d,  $J$  = 11.7 Hz, 1H), 4.48 (q,  $J$  = 11.9 Hz, 3H), 4.33 (d,  $J$  = 12.2 Hz, 1H), 4.01 (t,  $J$  = 4.8 Hz, 2H), 3.68 (t,  $J$  = 8.5 Hz, 1H), 3.63 (dd,  $J$  = 9.1, 5.6 Hz, 1H), 3.34 (dd,  $J$  = 9.5, 1.7 Hz, 1H), 2.82 (dt,  $J$  = 9.4, 4.2 Hz, 1H), 2.76 (d,  $J$  = 3.6 Hz, 1H), 2.10 (s, 3H), 1.50 (dt,  $J$  = 14.8, 7.3 Hz, 1H), 1.43 (td,  $J$  = 14.7, 7.3 Hz, 1H), 1.02 (s, 3H), 0.87 (dt,  $J$  = 14.4, 6.9 Hz, 2H), 0.79 (t,  $J$  = 7.4 Hz, 3H);  $^{13}\text{C}$  NMR (151 MHz,  $\text{CDCl}_3$ )  $\delta$  207.5, 138.5, 138.0, 137.9, 128.6, 128.4, 128.4, 128.3, 128.1, 128.0, 127.8, 127.6, 100.0, 81.3, 78.2, 73.8, 73.6, 72.2, 70.3, 69.9, 68.3, 61.0, 43.7, 36.4, 31.5, 29.7, 21.9, 8.7; ESI-HRMS:  $m/z$  calcd for  $\text{C}_{34}\text{H}_{40}\text{NaO}_6[\text{M}+\text{Na}]^+$ : 567.2717; found: 567.2708.

**(2*R*,3*S*,3*aR*,4*R*,5*R*,6*R*,7*aS*)-3-acetyl-4,5-bis(benzyloxy)-6-[(benzyloxy)methyl]-2-*i*-butyl-2-methylhexahydrofuro[2,3-*b*]pyran (**3al**)**

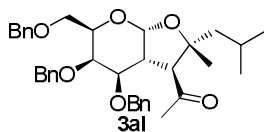

Compound **3al** was prepared according to Method A using (47.3 mg, 0.1 mmol) cyclopropanated sugars **1a** and **2l** (50.5  $\mu$ L, 0.4 mmol), after purified by column chromatography on silica gel (ethyl acetate/ petroleum ether = 1:6), afforded the desired product **3al** (50.4 mg, 0.088 mmol, 88%) as colorless syrup.  $[\alpha]_D^{20} +54.2$  (*c* 0.24, CHCl<sub>3</sub>); <sup>1</sup>H NMR (600 MHz, CDCl<sub>3</sub>)  $\delta$  7.40 – 7.28 (m, 15H), 5.41 (d, *J* = 4.2 Hz, 1H), 4.86 (d, *J* = 11.7 Hz, 1H), 4.67 (d, *J* = 12.2 Hz, 1H), 4.63 (d, *J* = 11.7 Hz, 1H), 4.51 (d, *J* = 11.8 Hz, 1H), 4.47 (d, *J* = 11.7 Hz, 1H), 4.33 (d, *J* = 12.2 Hz, 1H), 3.99 (dd, *J* = 13.8, 7.3 Hz, 2H), 3.70 (t, *J* = 8.6 Hz, 1H), 3.63 (dd, *J* = 9.1, 5.5 Hz, 1H), 3.34 (d, *J* = 9.6 Hz, 1H), 2.78 (dd, *J* = 9.0, 4.3 Hz, 1H), 2.72 (d, *J* = 3.2 Hz, 1H), 2.09 (s, 3H), 1.74 – 1.65 (m, 1H), 1.41 (dd, *J* = 14.3, 4.5 Hz, 1H), 1.20 (dd, *J* = 14.4, 7.4 Hz, 1H), 1.05 (s, 3H), 0.89 (d, *J* = 6.5 Hz, 3H), 0.86 (d, *J* = 6.6 Hz, 3H); <sup>13</sup>C NMR (150 MHz, CDCl<sub>3</sub>)  $\delta$  207.4, 138.5, 138.0, 137.8, 128.6, 128.5, 128.4, 128.3, 128.2, 128.0, 127.8, 127.6, 99.8, 81.1, 78.3, 73.9, 73.6, 72.2, 70.3, 69.8, 68.4, 63.3, 52.8, 43.0, 31.6, 24.9, 24.5, 24.1, 22.1; ESI-HRMS: *m/z* calcd for C<sub>36</sub>H<sub>44</sub>NaO<sub>6</sub>[M+Na]<sup>+</sup>: 595.3030; found: 595.3022.

**(2*R*,3*S*,3*aR*,4*R*,5*R*,6*R*,7*aS*)-3-acetyl-4,5-bis(benzyloxy)-6-[(benzyloxy)methyl]-2-cyclopropyl-2-methylhexahydrofuro[2,3-*b*]pyran (**3am**)**

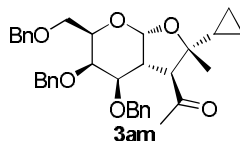

Compound **3am** was prepared according to Method A using (47.3 mg, 0.1 mmol) cyclopropanated sugars **1a** and **2m** (38.0  $\mu$ L, 0.4 mmol), after purified by column chromatography on silica gel (ethyl acetate/ petroleum ether = 1:9), afforded the desired product **3am** (52.3 mg, 0.094 mmol, 94%) as colorless syrup.  $[\alpha]_D^{20} +63.6$  (*c* 0.42, CHCl<sub>3</sub>); <sup>1</sup>H NMR (600 MHz, CDCl<sub>3</sub>)  $\delta$  7.38 – 7.28 (m, 15H), 5.39 (d, *J* = 4.5 Hz, 1H), 4.85 (d, *J* = 11.7 Hz, 1H), 4.68 (d, *J* = 12.2 Hz, 1H), 4.62 (d, *J* = 11.7 Hz, 1H), 4.51 (d, *J* = 11.8 Hz, 1H), 4.47 (d, *J* = 11.8 Hz, 1H), 4.37 (d, *J* = 12.1 Hz, 1H), 4.02 – 3.96 (m, 2H), 3.68 (t, *J* = 8.3 Hz, 1H), 3.66 – 3.61 (m, 1H), 3.40 (d, *J* = 9.0 Hz, 1H), 3.00 (d,

$J = 4.6$  Hz, 1H), 2.88 (dt,  $J = 9.0, 4.6$  Hz, 1H), 2.15 (s, 3H), 1.01 (s, 3H), 0.93 – 0.87 (m, 1H), 0.47 – 0.36 (m, 3H), 0.29 – 0.24 (d,  $J = 5.8$  Hz, 1H);  $^{13}\text{C}$  NMR (150 MHz,  $\text{CDCl}_3$ )  $\delta$  207.0, 138.5, 138.0, 128.5, 128.4, 128.3, 128.3, 128.0, 128.0, 127.9, 127.8, 127.6, 99.1, 79.9, 78.5, 73.7, 73.6, 72.7, 70.6, 70.2, 68.2, 63.8, 43.5, 31.6, 29.7, 23.2, 22.0, 2.5, 1.1; ESI-HRMS:  $m/z$  calcd for  $\text{C}_{35}\text{H}_{40}\text{NaO}_6[\text{M}+\text{Na}]^+$ : 579.2717; found: 579.2722.

**(2*S*,3*S*,3*aR*,4*R*,5*S*,6*R*,7*aS*)-3-acetyl-4,5-bis(benzyloxy)-6-[(benzyloxy)methyl]-2-methyl-2-phenylhexahydrofuro[2,3-*b*]pyran**

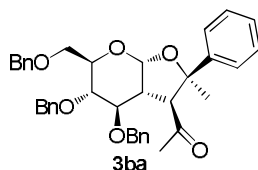

Compound **3ba** was prepared according to Method A using (47.3 mg, 0.1 mmol) cyclopropanated sugars **1b** and ketone **2a** (47.2  $\mu\text{L}$ , 0.4 mmol),, after purified by column chromatography on silica gel (ethyl acetate/ petroleum ether = 1:9), afforded the desired product **3ba** (50.9 mg, 0.086 mmol, 86%) as colorless syrup.  $[\alpha]_{\text{D}}^{20} +27.3$  ( $c$  0.25,  $\text{CHCl}_3$ );  $^1\text{H}$  NMR (600 MHz,  $\text{CDCl}_3$ )  $\delta$  7.51 (d,  $J = 7.5$  Hz, 2H), 7.38 – 7.22 (m, 16H), 7.13 – 7.09 (m, 2H), 5.72 (d,  $J = 5.4$  Hz, 1H), 4.63 (d,  $J = 12.1$  Hz, 1H), 4.59 (t,  $J = 11.6$  Hz, 2H), 4.46 (d,  $J = 12.1$  Hz, 1H), 4.43 (s, 2H), 4.15 – 4.11 (m, 1H), 3.76 (ddd,  $J = 14.1, 10.6, 4.2$  Hz, 2H), 3.64 (ddd,  $J = 17.4, 13.3, 6.2$  Hz, 2H), 3.42 (t,  $J = 4.9$  Hz, 1H), 3.05 (dt,  $J = 7.6, 5.4$  Hz, 1H), 1.92 (s, 3H), 1.42 (s, 3H);  $^{13}\text{C}$  NMR (150 MHz,  $\text{CDCl}_3$ )  $\delta$  206.8, 146.1, 138.3, 138.2, 137.8, 128.6, 128.5, 128.4, 128.4, 127.9, 127.8, 127.7, 127.6, 127.4, 125.0, 98.8, 83.5, 76.9, 76.4, 73.5, 72.8, 72.6, 72.4, 69.2, 62.6, 45.1, 31.9, 29.7, 24.4. ESI-HRMS:  $m/z$  calcd for  $\text{C}_{38}\text{H}_{40}\text{NaO}_6[\text{M}+\text{Na}]^+$ : 615.2717; found: 615.2731.

**(2*S*,3*S*,3*aR*,4*R*,5*S*,6*R*,7*aS*)-3-acetyl-4,5-bis(benzyloxy)-6-[(benzyloxy)methyl]-2-methyl-2-(4-tolyl)-hexahydrofuro[2,3-*b*]pyran (3bb)**

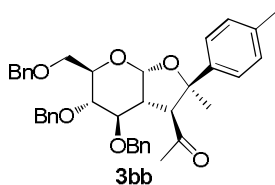

Compound **3bb** was prepared according to Method A using (47.3 mg, 0.1 mmol) cyclopropanated sugars **1b** and ketone **2b** (56.2  $\mu\text{L}$ , 0.4 mmol),, after purified by column chromatography on silica

gel (ethyl acetate/ petroleum ether = 1:9), afforded the desired product **3bb** (51.5 mg, 0.085 mmol, 85%) as colorless syrup.  $[\alpha]_D^{20} +63.9$  (*c* 0.30, CHCl<sub>3</sub>); <sup>1</sup>H NMR (600 MHz, CDCl<sub>3</sub>) δ 7.42 – 7.28 (m, 10H), 7.25 (dd, *J* = 7.1, 2.6 Hz, 5H), 7.15 (d, *J* = 8.0 Hz, 2H), 7.14 – 7.09 (m, 2H), 5.71 (d, *J* = 5.4 Hz, 1H), 4.63 (d, *J* = 12.1 Hz, 1H), 4.59 (t, *J* = 12.1 Hz, 2H), 4.48 (d, *J* = 12.1 Hz, 1H), 4.43 (s, 2H), 4.15 – 4.10 (m, 1H), 3.77 (dd, *J* = 10.6, 4.8 Hz, 1H), 3.73 (dd, *J* = 10.6, 3.5 Hz, 1H), 3.66 – 3.60 (m, 2H), 3.43 (t, *J* = 4.7 Hz, 1H), 3.07 (dt, *J* = 8.2, 5.3 Hz, 1H), 2.36 (s, 3H), 1.92 (s, 3H), 1.40 (s, 3H); <sup>13</sup>C NMR (150 MHz, CDCl<sub>3</sub>) δ 206.8, 143.1, 138.3, 138.3, 137.8, 137.0, 129.2, 128.4, 128.4, 128.4, 127.9, 127.9, 127.8, 127.7, 127.6, 124.9, 98.7, 83.5, 76.4, 73.4, 72.7, 72.5, 72.3, 69.3, 62.6, 45.0, 31.8, 29.7, 24.3, 21.0; ESI-HRMS: *m/z* calcd for C<sub>39</sub>H<sub>42</sub>NaO<sub>6</sub>[M+Na]<sup>+</sup>: 629.2874; found: 629.2891.

**(2*S*,3*S*,3*aR*,4*R*,5*S*,6*R*,7*aS*)-3-acetyl-4,5-bis(benzyloxy)-6-[(benzyloxy)methyl]-2-methyl-2-(4-chlorophenyl)hexahydrofuro[2,3-*b*]pyran (3bc)**

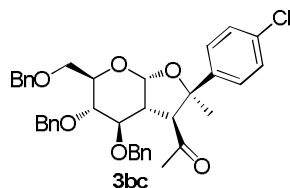

Compound **3bc** was prepared according to Method A using (47.3 mg, 0.1 mmol) cyclopropanated sugars **1b** and ketone **2c** (53.5 μL, 0.4 mmol), after purified by column chromatography on silica gel (ethyl acetate/ petroleum ether = 1:9), afforded the desired product **3bc** (51.4 mg, 0.082 mmol, 82%) as colorless syrup.  $[\alpha]_D^{20} +40.0$  (*c* 0.13, CHCl<sub>3</sub>); <sup>1</sup>H NMR (600 MHz, CDCl<sub>3</sub>) δ 7.43 (d, *J* = 8.5 Hz, 2H), 7.35 – 7.28 (m, 11H), 7.24 (dd, *J* = 12.4, 4.6 Hz, 4H), 7.11 (dd, *J* = 6.2, 2.8 Hz, 2H), 5.67 (d, *J* = 5.2 Hz, 1H), 4.59 (q, *J* = 12.1 Hz, 3H), 4.49 (d, *J* = 12.2 Hz, 1H), 4.43 (s, 2H), 4.12 – 4.08 (m, 1H), 3.77 (dd, *J* = 10.5, 5.1 Hz, 1H), 3.72 (dd, *J* = 10.5, 3.7 Hz, 1H), 3.62 (dd, *J* = 6.6, 4.8 Hz, 1H), 3.56 (d, *J* = 8.3 Hz, 1H), 3.39 (t, *J* = 4.8 Hz, 1H), 3.02 (dt, *J* = 9.5, 5.2 Hz, 1H), 1.91 (s, 3H), 1.38 (s, 3H); <sup>13</sup>C NMR (150 MHz, CDCl<sub>3</sub>) δ 206.4, 144.8, 138.2, 137.7, 133.3, 128.7, 128.5, 128.4, 128.4, 127.9, 127.9, 127.8, 127.6, 126.6, 98.6, 83.2, 76.4, 76.1, 73.5, 72.7, 72.6, 72.4, 69.1, 62.4, 45.1, 31.8, 29.7, 24.3; ESI-HRMS: *m/z* calcd for C<sub>38</sub>H<sub>39</sub>ClNaO<sub>6</sub>[M+Na]<sup>+</sup>: 649.2327; found: 649.2325.

**(2*S*,3*S*,3*aR*,4*R*,5*S*,6*R*,7*aS*)-3-acetyl-4,5-bis(benzyloxy)-6-[(benzyloxy)methyl]-2-methyl-2-(4-bromophenyl)hexahydrofuro[2,3-*b*]pyran (3bd)**

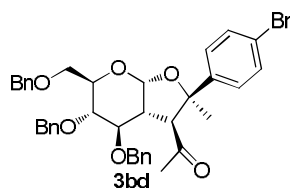

Compound **3bd** was prepared according to Method A using (47.3 mg, 0.1 mmol) cyclopropanated sugars **1b** and ketone **2d** (81.2 mg, 0.4 mmol), after purified by column chromatography on silica gel (ethyl acetate/ petroleum ether = 1:9), afforded the desired product **3bd** (55.0 mg, 0.082 mmol, 82%) as colorless syrup.  $[\alpha]_D^{20} +35.0$  (*c* 0.29, CHCl<sub>3</sub>); <sup>1</sup>H NMR (600 MHz, CDCl<sub>3</sub>) δ 7.45 (d, *J* = 8.4 Hz, 2H), 7.37 (d, *J* = 8.4 Hz, 2H), 7.35 – 7.26 (m, 11H), 7.22 (d, *J* = 7.0 Hz, 2H), 7.12 (s, 2H), 5.67 (d, *J* = 5.2 Hz, 1H), 4.63 – 4.57 (m, 3H), 4.48 (d, *J* = 12.2 Hz, 1H), 4.44 (s, 2H), 4.12 – 4.07 (m, 1H), 3.77 (dd, *J* = 10.3, 5.1 Hz, 1H), 3.74 – 3.69 (m, 1H), 3.64 – 3.60 (m, 1H), 3.55 (d, *J* = 8.1 Hz, 1H), 3.39 (t, *J* = 4.7 Hz, 1H), 3.01 (dt, *J* = 8.4, 5.3 Hz, 1H), 1.92 (s, 3H), 1.37 (s, 3H); <sup>13</sup>C NMR (150 MHz, CDCl<sub>3</sub>) δ 206.4, 145.3, 138.2, 137.7, 131.7, 128.5, 128.4, 128.4, 127.9, 127.9, 127.8, 127.6, 126.9, 121.4, 98.6, 83.3, 76.4, 76.1, 73.5, 72.7, 72.7, 72.4, 69.0, 62.3, 45.2, 31.9, 29.7, 24.3; ESI-HRMS: *m/z* calcd for C<sub>38</sub>H<sub>39</sub>BrNaO<sub>6</sub>[*M*+Na]<sup>+</sup>: 693.1822; found: 693.1830.

**(3*S*,3*aR*,4*R*,5*S*,6*R*,7*aS*)-3-acetyl-4,5-bis(benzyloxy)-6-[(benzyloxy)methyl]-2,2-di-methylhexahydrofuro[2,3-*b*]pyran (**3bj**)**

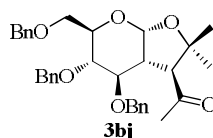

Compound **3bj** was prepared according to Method B using (47.3 mg, 0.1 mmol) cyclopropanated sugars **1b** and acetone **2j** (74.2 μL, 1.0 mmol), after purified by column chromatography on silica gel (ethyl acetate/ petroleum ether = 1:6), afforded the desired product **3bj** (48.8 mg, 0.092 mmol, 92%) as colorless syrup.  $[\alpha]_D^{20} +47.8$  (*c* 0.32, CHCl<sub>3</sub>); <sup>1</sup>H NMR (600 MHz, CDCl<sub>3</sub>) δ 7.36 – 7.27 (m, 13H), 7.15 – 7.12 (m, 2H), 5.48 (d, *J* = 5.9 Hz, 1H), 4.65 (d, *J* = 12.2 Hz, 1H), 4.59 (dd, *J* = 12.3 Hz, 2H), 4.53 (d, *J* = 12.1 Hz, 1H), 4.35 (s, 2H), 3.95 – 3.90 (m, 1H), 3.68 (dd, *J* = 4.2, 2.4 Hz, 2H), 3.65 (d, *J* = 7.2 Hz, 1H), 3.52 (t, *J* = 3.2 Hz, 1H), 3.29 (d, *J* = 10.1 Hz, 1H), 3.22 – 3.17 (m, 1H), 2.06 (s, 3H), 1.55 (s, 3H), 1.03 (s, 3H); <sup>13</sup>C NMR (150 MHz, CDCl<sub>3</sub>) δ 205.6, 138.3, 138.2, 137.8, 128.4, 128.4, 128.3, 128.1, 127.9, 127.8, 127.5, 97.9, 80.8, 76.0, 75.5, 73.4, 72.1,

71.5, 71.3, 69.5, 61.2, 43.1, 31.1, 29.8, 29.7, 24.4; ESI-HRMS:  $m/z$  calcd for  $C_{33}H_{38}NaO_6[M+Na]^+$ : 553.2561; found: 553.2550.

**(2*R*,3*S*,3*aR*,4*R*,5*S*,6*R*,7*aS*)-3-acetyl-4,5-bis(benzyloxy)-6-[(benzyloxy)methyl]-**

**2-ethyl-2-methylhexahydrofuro[2,3-*b*]pyran (3bk)**

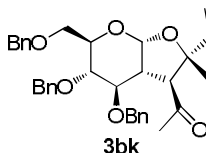

Compound **3bk** was prepared according to Method A using (47.3 mg, 0.1 mmol) cyclopropanated sugars **1b** and 2-butanone **2k** (36.2  $\mu$ L, 0.4 mmol), after purified by column chromatography on silica gel (ethyl acetate/ petroleum ether = 1:6), afforded the desired product **3bk** (45.2 mg, 0.083 mmol, 83%) as colorless syrup.  $[\alpha]_D^{20} +9.0$  ( $c$  0.37,  $CHCl_3$ );  $^1H$  NMR (600 MHz,  $CDCl_3$ )  $\delta$  7.38 – 7.26 (m, 13H), 7.16 (d,  $J$  = 7.7 Hz, 2H), 5.47 (d,  $J$  = 5.7 Hz, 1H), 4.64 (t,  $J$  = 10.1 Hz, 2H), 4.59 (d,  $J$  = 12.1 Hz, 1H), 4.54 (d,  $J$  = 12.1 Hz, 1H), 4.40 (s, 2H), 3.97 (dt,  $J$  = 8.4, 4.4 Hz, 1H), 3.72 – 3.66 (m, 2H), 3.63 (dd,  $J$  = 6.9, 3.2 Hz, 1H), 3.52 (t,  $J$  = 3.9 Hz, 1H), 3.29 (d,  $J$  = 9.3 Hz, 1H), 3.14 – 3.09 (m, 1H), 2.02 (s, 3H), 1.78 (q,  $J$  = 7.4 Hz, 2H), 1.26 (s, 3H), 0.99 (s, 3H);  $^{13}C$  NMR (150 MHz,  $CDCl_3$ )  $\delta$  206.1, 138.3, 138.3, 137.9, 128.5, 128.4, 128.3, 128.1, 127.8, 127.8, 127.5, 97.8, 83.0, 76.1, 76.0, 73.4, 72.3, 71.8, 71.6, 69.4, 59.1, 43.5, 35.0, 31.9, 31.1, 29.7, 22.0, 8.5; ESI-HRMS:  $m/z$  calcd for  $C_{34}H_{40}NaO_6[M+Na]^+$ : 567.2717; found: 567.2733.

**(2*R*,3*S*,3*aR*,4*R*,5*S*,6*R*,7*aS*)-3-acetyl-4,5-bis(benzyloxy)-6-[(benzyloxy)methyl]-**

**2-cyclopropyl-2-methyl-hexahydrofuro[2,3-*b*]pyran (3bm)**

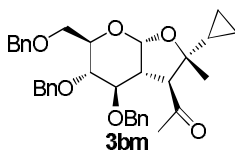

Compound **3bm** was prepared according to Method A using (47.3 mg, 0.1 mmol) cyclopropanated sugars **1b** and **2m** (38.0  $\mu$ L, 0.4 mmol), after purified by column chromatography on silica gel (ethyl acetate/ petroleum ether = 1:9), afforded the desired product **3bm** (52.8 mg, 0.095 mmol, 95%) as colorless syrup.  $[\alpha]_D^{20} +13.0$  ( $c$  0.26,  $CHCl_3$ );  $^1H$  NMR (600 MHz,  $CDCl_3$ )  $\delta$  7.36 – 7.25 (m, 13H), 7.15 (d,  $J$  = 6.4 Hz, 2H), 5.43 (d,  $J$  = 5.9 Hz, 1H), 4.65 (d,  $J$  = 12.2 Hz, 1H), 4.59 (d,  $J$  = 8.7 Hz, 1H), 4.57 (d,  $J$  = 8.6 Hz, 1H), 4.54 (d,  $J$  = 12.1 Hz, 1H), 4.36 (s, 2H), 3.96 (dt,  $J$  = 8.7, 4.5 Hz, 1H), 3.67 (d,  $J$  = 4.4 Hz, 2H), 3.61 (dd,  $J$  = 7.2, 1.6 Hz, 1H), 3.53 (t,  $J$  = 3.1 Hz, 1H), 3.49 (d,

$J = 10.5$  Hz, 1H), 3.23 – 3.17 (m, 1H), 2.12 (s, 3H), 1.20 – 1.13 (m, 1H), 0.95 (s, 3H), 0.88 (t,  $J = 6.9$  Hz, 1H), 0.74 – 0.67 (m, 1H), 0.54 – 0.44 (m, 2H);  $^{13}\text{C}$  NMR (150 MHz,  $\text{CDCl}_3$ )  $\delta$  206.0, 138.3, 138.3, 137.9, 128.4, 128.4, 128.3, 128.0, 127.8, 127.8, 127.5, 97.4, 81.9, 75.9, 75.5, 73.4, 72.0, 71.6, 71.5, 69.6, 61.6, 42.9, 31.3, 29.7, 21.6, 21.4, 2.8, 1.2; ESI-HRMS:  $m/z$  calcd for  $\text{C}_{35}\text{H}_{40}\text{NaO}_6[\text{M}+\text{Na}]^+$ : 579.2717; found: 579.2721.

**(2*S*,3*S*,3*aS*,4*R*,5*R*,6*aR*)-3-acetyl-4-(benzyloxy)-5-[(benzyloxy)methyl]-2-methyl-2-phenyl-hexahydrofuro[2,3-*b*]furan (3ca)**

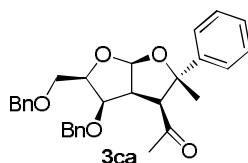

Compound **3ca** was prepared according to Method A using (35.2 mg, 0.1 mmol) cyclopropanated sugars **1c** and ketone **2a** (47.2  $\mu\text{L}$ , 0.4 mmol), after purified by column chromatography on silica gel (ethyl acetate/ petroleum ether = 1:9), afforded the desired product **3ca** (41.1 mg, 0.087 mmol, 87%) as colorless syrup.  $[\alpha]_{\text{D}}^{20}$  -29.2 ( $c$  0.27,  $\text{CHCl}_3$ );  $^1\text{H}$  NMR (600 MHz,  $\text{CDCl}_3$ )  $\delta$  7.57 (d,  $J = 7.3$  Hz, 2H), 7.39 – 7.22 (m, 11H), 7.14 (d,  $J = 6.6$  Hz, 2H), 5.67 (d,  $J = 5.0$  Hz, 1H), 4.63 (d,  $J = 12.1$  Hz, 1H), 4.57 (d,  $J = 12.1$  Hz, 1H), 4.40 (d,  $J = 11.4$  Hz, 1H), 4.36 – 4.31 (m, 3H), 3.86 (dd,  $J = 10.3, 4.1$  Hz, 1H), 3.82 (dd,  $J = 13.8, 8.7$  Hz, 1H), 3.75 (dd,  $J = 10.2, 5.6$  Hz, 2H), 1.77 (s, 3H), 1.44 (s, 3H);  $^{13}\text{C}$  NMR (150 MHz,  $\text{CDCl}_3$ )  $\delta$  206.1, 145.1, 138.3, 137.6, 128.6, 128.4, 127.8, 127.7, 127.6, 127.6, 127.5, 127.0, 125.7, 106.1, 88.8, 79.8, 78.0, 73.67, 73.43, 69.8, 62.1, 50.5, 31.6, 29.7, 22.9; ESI-HRMS:  $m/z$  calcd for  $\text{C}_{30}\text{H}_{32}\text{NaO}_5[\text{M}+\text{Na}]^+$ : 495.2142; found: 495.2144.

**(2*S*,3*S*,3*aS*,4*R*,5*R*,6*aR*)-3-acetyl-4-(benzyloxy)-5-[(benzyloxy)methyl]-2-methyl-2-(4-tolyl)-hexahydrofuro[2,3-*b*]furan (3cb)**

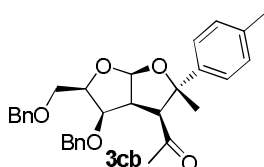

Compound **3cb** was prepared according to Method A using (35.2 mg, 0.1 mmol) cyclopropanated sugars **1c** and ketone **2b** (56.2  $\mu\text{L}$ , 0.4 mmol), after purified by column chromatography on silica gel (ethyl acetate/ petroleum ether = 1:9), afforded the desired product **3cb** (38.9 mg, 0.080 mmol,



80%) as colorless syrup.  $[\alpha]_D^{20}$  -133.9 ( $c$  0.12,  $\text{CHCl}_3$ );  $^1\text{H}$  NMR (600 MHz,  $\text{CDCl}_3$ )  $\delta$  7.45 (d,  $J$  = 8.2 Hz, 2H), 7.36 – 7.27 (m, 8H), 7.14 (d,  $J$  = 7.8 Hz, 4H), 5.65 (d,  $J$  = 5.0 Hz, 1H), 4.64 (d,  $J$  = 12.0 Hz, 1H), 4.57 (d,  $J$  = 12.1 Hz, 1H), 4.40 (d,  $J$  = 11.4 Hz, 1H), 4.32 (dd,  $J$  = 8.9, 6.0 Hz, 3H), 3.86 (dd,  $J$  = 10.3, 4.0 Hz, 1H), 3.84 – 3.79 (m, 1H), 3.76 (dd,  $J$  = 10.4, 6.0 Hz, 1H), 3.73 (d,  $J$  = 10.0 Hz, 1H), 2.35 (s, 3H), 1.77 (s, 3H), 1.42 (s, 3H);  $^{13}\text{C}$  NMR (150 MHz,  $\text{CDCl}_3$ )  $\delta$  206.2, 142.2, 138.3, 137.6, 137.3, 129.0, 128.4, 128.3, 127.8, 127.8, 127.6, 127.5, 125.6, 106.0, 88.7, 79.7, 78.0, 73.6, 73.4, 69.9, 62.2, 50.3, 31.6, 29.7, 22.9, 21.0; ESI-HRMS:  $m/z$  calcd for  $\text{C}_{31}\text{H}_{34}\text{NaO}_5[\text{M}+\text{Na}]^+$ : 509.2298; found: 509.2304.

**(2*S*,3*S*,3*aS*,4*R*,5*R*,6*aR*)-3-acetyl-4-(benzyloxy)-5-[(benzyloxy)methyl]-2-methyl-2-(4-bromophenyl)hexahydrofuro[2,3-*b*]furan (3cd)**

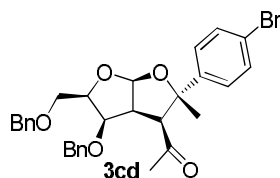

Compound **3cd** was prepared according to Method A using (35.2 mg, 0.1 mmol) cyclopropanated sugars **1c** and ketone **2d** (81.2 mg, 0.4 mmol), after purified by column chromatography on silica gel (ethyl acetate/ petroleum ether = 1:9), afforded the desired product **3cd** (42.9 mg, 0.078 mmol, 78%) as colorless syrup.  $[\alpha]_D^{20}$  -70.2 ( $c$  0.17,  $\text{CHCl}_3$ );  $^1\text{H}$  NMR (600 MHz,  $\text{CDCl}_3$ )  $\delta$  7.43 (s, 2H), 7.33 – 7.26 (m, 10H), 7.13 (d,  $J$  = 6.8 Hz, 2H), 5.64 (d,  $J$  = 4.9 Hz, 1H), 4.59 (d,  $J$  = 12.0 Hz, 1H), 4.55 (d,  $J$  = 11.9 Hz, 1H), 4.40 (d,  $J$  = 11.4 Hz, 1H), 4.35 – 4.27 (m, 4H), 3.82 (dd,  $J$  = 10.3, 4.3 Hz, 1H), 3.81 – 3.76 (m, 1H), 3.72 (d,  $J$  = 9.9 Hz, 1H), 3.69 (dd,  $J$  = 10.3, 6.0 Hz, 1H), 1.77 (s, 3H), 1.40 (s, 3H);  $^{13}\text{C}$  NMR (150 MHz,  $\text{CDCl}_3$ )  $\delta$  205.8, 144.5, 138.1, 137.5, 131.4, 128.4, 127.9, 127.8, 127.7, 127.6, 127.6, 121.6, 106.1, 88.5, 79.7, 77.9, 73.8, 73.5, 69.6, 61.8, 50.6, 31.7, 23.0; ESI-HRMS:  $m/z$  calcd for  $\text{C}_{30}\text{H}_{31}\text{BrNaO}_5[\text{M}+\text{Na}]^+$ : 573.1247; found: 573.1258.

**(2*S*,3*S*,3*aS*,4*R*,5*R*,6*aR*)-3-acetyl-4-(benzyloxy)-5-[(benzyloxy)methyl]-2-ethyl-2-phenyl-hexahydrofuro[2,3-*b*]furan (3cf)**

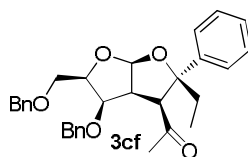

Compound **3cf** was prepared according to Method A using (35.2 mg, 0.1 mmol) cyclopropanated

sugars **1c** and ketone **2f** (54.3  $\mu$ L, 0.4 mmol), after purified by column chromatography on silica gel (ethyl acetate/ petroleum ether = 1:9), afforded the desired product **3cf** (36.5 mg, 0.075 mmol, 75%) as colorless syrup.  $[\alpha]_D^{20}$  -23.0 (*c* 0.37, CHCl<sub>3</sub>); <sup>1</sup>H NMR (600 MHz, CDCl<sub>3</sub>)  $\delta$  7.49 (d, *J* = 7.7 Hz, 2H), 7.37 – 7.24 (m, 11H), 7.12 (d, *J* = 6.6 Hz, 2H), 5.69 (d, *J* = 5.2 Hz, 1H), 4.64 (d, *J* = 12.1 Hz, 1H), 4.55 (d, *J* = 12.0 Hz, 1H), 4.40 (d, *J* = 11.5 Hz, 1H), 4.38 – 4.34 (m, 1H), 4.32 (dd, *J* = 13.3, 4.7 Hz, 2H), 3.83 (dd, *J* = 10.4, 4.2 Hz, 1H), 3.81 – 3.76 (m, 1H), 3.74 (dd, *J* = 10.4, 6.7 Hz, 1H), 3.64 (d, *J* = 9.8 Hz, 1H), 1.87 (s, 3H), 1.83 (dt, *J* = 14.6, 7.3 Hz, 1H), 1.68 (dq, *J* = 14.5, 7.2 Hz, 1H), 0.76 (t, *J* = 7.3 Hz, 3H); <sup>13</sup>C NMR (150 MHz, CDCl<sub>3</sub>)  $\delta$  206.5, 143.3, 138.3, 137.5, 128.4, 127.8, 127.7, 127.6, 127.5, 127.3, 125.8, 106.1, 91.3, 80.0, 78.1, 73.5, 73.4, 70.1, 62.4, 50.9, 32.3, 27.6, 7.7; ESI-HRMS: *m/z* calcd for C<sub>31</sub>H<sub>34</sub>NaO<sub>5</sub>[M+Na]<sup>+</sup>: 509.2298; found: 509.2305.

**(2*S*,3*S*,3*aS*,4*R*,5*R*,6*aR*)-3-acetyl-4-(benzyloxy)-5-[(benzyloxy)methyl]-2-(furan-2-yl)**

**2-methyl-hexahydrofuro[2,3-*b*]furan (**3cg**)**

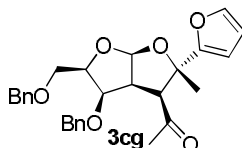

Compound **3cg** was prepared according to Method A using (35.2 mg, 0.1 mmol) cyclopropanated sugars **1c** and ketone **2g** (44.5 mg, 0.4 mmol), after purified by column chromatography on silica gel (ethyl acetate/ petroleum ether = 1:9), afforded the desired product **3cg** (28.7 mg, 0.062 mmol, 62%) as colorless syrup.  $[\alpha]_D^{20}$  -40.0 (*c* 0.09, CHCl<sub>3</sub>); <sup>1</sup>H NMR (600 MHz, CDCl<sub>3</sub>)  $\delta$  7.35 – 7.28 (m, 9H), 7.20 (d, *J* = 7.2 Hz, 2H), 6.36 (d, *J* = 3.2 Hz, 1H), 6.34 (d, *J* = 1.7 Hz, 1H), 5.64 (d, *J* = 5.6 Hz, 1H), 4.69 (d, *J* = 12.2 Hz, 1H), 4.58 (d, *J* = 12.2 Hz, 1H), 4.44 (d, *J* = 8.4 Hz, 1H), 4.40 – 4.36 (m, 3H), 4.14 (d, *J* = 9.3 Hz, 1H), 3.97 (d, *J* = 5.3 Hz, 2H), 3.86 (td, *J* = 8.6, 5.8 Hz, 1H), 1.80 (s, 3H), 1.36 (s, 3H); <sup>13</sup>C NMR (150 MHz, CDCl<sub>3</sub>)  $\delta$  204.8, 155.0, 142.6, 138.6, 137.7, 128.4, 128.3, 127.8, 127.7, 127.5, 127.4, 127.4, 110.4, 107.9, 106.4, 82.6, 80.6, 78.1, 73.5, 73.2, 70.1, 58.3, 47.3, 30.3, 21.3; ESI-HRMS: *m/z* calcd for C<sub>28</sub>H<sub>30</sub>NaO<sub>6</sub>[M+Na]<sup>+</sup>: 485.1935; found: 485.1951.

**Spirocyclic compound **3ci****

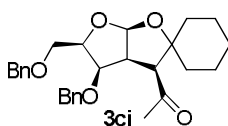

Compound **3ci** was prepared according to Method A using (35.2 mg, 0.1 mmol) cyclopropanated sugars **1c** and ketone **2i** (41.9  $\mu$ L, 0.4 mmol), after purified by column chromatography on silica gel (ethyl acetate/ petroleum ether = 1:9), afforded the desired product **3ci** (39.6 mg, 0.088 mmol, 88%) as colorless syrup.  $[\alpha]_D^{20}$  -10.0 (*c* 0.32, CHCl<sub>3</sub>); <sup>1</sup>H NMR (600 MHz, CDCl<sub>3</sub>)  $\delta$  7.36 – 7.27 (m, 8H), 7.19 (d, *J* = 7.4 Hz, 2H), 5.51 (d, *J* = 5.2 Hz, 1H), 4.61 (s, 1H), 4.60 (s, 1H), 4.42 (d, *J* = 11.7 Hz, 1H), 4.33 (d, *J* = 11.6 Hz, 1H), 4.27 (d, *J* = 5.2 Hz, 2H), 3.80 (dd, *J* = 9.9, 2.5 Hz, 1H), 3.76 – 3.71 (m, 1H), 3.69 (td, *J* = 8.5, 4.5 Hz, 1H), 3.37 (d, *J* = 9.1 Hz, 1H), 2.06 (s, 3H), 1.87 (d, *J* = 13.1 Hz, 1H), 1.77 – 1.70 (m, 1H), 1.58 (s, 4H), 1.48 (d, *J* = 13.4 Hz, 1H), 1.07 (d, *J* = 13.0 Hz, 1H), 0.88 (d, *J* = 6.5 Hz, 1H), 0.79 (d, *J* = 13.4 Hz, 1H); <sup>13</sup>C NMR (150 MHz, CDCl<sub>3</sub>)  $\delta$  205.9, 138.3, 137.8, 128.4, 128.3, 127.8, 127.8, 127.5, 127.4, 105.8, 86.5, 79.9, 78.2, 73.4, 73.3, 69.5, 60.6, 48.7, 38.8, 33.4, 31.5, 29.7, 25.4, 23.2, 21.5; ESI-HRMS: *m/z* calcd for C<sub>28</sub>H<sub>34</sub>NaO<sub>5</sub>[M+Na]<sup>+</sup>: 473.2298; found: 473.2304.

**(3*S*,3*aS*,4*R*,5*R*,6*aR*)-3-acetyl-4-(benzyloxy)-5-[(benzyloxy)methyl]-2,2-di-methyl-hexahydrofuro[2,3-*b*]furan (3cj)**

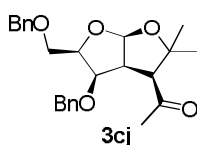

Compound **3cj** was prepared according to Method B using (35.2 mg, 0.1 mmol) cyclopropanated sugars **1c** and acetone **2j** (74.2  $\mu$ L, 1.0 mmol), after purified by column chromatography on silica gel (ethyl acetate/ petroleum ether = 1:9), afforded the desired product **3cj** (34.0 mg, 0.083 mmol, 83%) as colorless syrup.  $[\alpha]_D^{20}$  -6.1 (*c* 0.16, CHCl<sub>3</sub>); <sup>1</sup>H NMR (600 MHz, CDCl<sub>3</sub>)  $\delta$  7.36 – 7.26 (m, 8H), 7.20 (d, *J* = 7.0 Hz, 2H), 5.50 (d, *J* = 5.4 Hz, 1H), 4.62 (d, *J* = 12.0 Hz, 1H), 4.58 (d, *J* = 12.1 Hz, 1H), 4.43 (d, *J* = 11.6 Hz, 1H), 4.35 (d, *J* = 11.6 Hz, 1H), 4.31 – 4.25 (m, 2H), 3.82 (dd, *J* = 10.3, 3.7 Hz, 1H), 3.75 – 3.69 (m, 2H), 3.49 (d, *J* = 9.1 Hz, 1H), 2.05 (s, 3H), 1.52 (s, 3H), 1.01 (s, 3H); <sup>13</sup>C NMR (150 MHz, CDCl<sub>3</sub>)  $\delta$  205.7, 138.3, 137.7, 128.4, 128.3, 127.9, 127.8, 127.6, 127.4, 106.1, 85.0, 80.0, 78.1, 73.5, 73.3, 69.5, 60.1, 49.1, 30.9, 29.8, 29.7, 24.7; ESI-HRMS: *m/z* calcd for C<sub>25</sub>H<sub>30</sub>NaO<sub>5</sub>[M+Na]<sup>+</sup>: 433.1985; found: 433.1994.

**Selected IR data for the products:**

a. **3ah**: IR (KBr)  $\nu$  3423.1, 2918.7, 2869.9, 1715.5, 1615.2, 1585.4, 1483.7, 1454.0, 1358.2, 1320.0, 1186.7, 1125.9, 1098.6, 1062.5, 1027.3, 969.1, 920.8, 751.8, 698.1.

b. **3cb**: IR (neat)  $\nu$  2920.0, 2867.9, 1710.4, 1514.1, 1596.4, 1453.6, 1378.8, 1352.8, 1244.6, 1120.5, 1104.1, 1053.2, 1028.1, 819.2, 737.7, 698.3.

c. **3cd**: IR (neat)  $\nu$  2916.5, 2867.9, 1711.6, 1590.7, 1495.0, 1453.7, 1397.7, 1356.4, 1243.2, 1103.3, 1083.1, 1047.2, 1007.8, 912.2, 829.4, 738.0, 698.6.

### The stereochemistry of the products

The configuration of the products was unambiguously assigned by extensively studied the NMR and NOE of the products. The coupling constants between  $H_{7a}$  and  $H_{3a}$  ( $J_{H7a, H3a} = 4.3 - 4.5$  Hz for the products from compound **1a**,  $J_{H7a, H3a} = 5.2 - 5.9$  Hz for the products from compound **1b** and  $J_{H6a, H3a} = 4.9 - 5.6$  Hz for the products from compound **1c**) showed convincingly that the fused ring system have a *cis*-bicyclic configuration, the stereochemistry of C2 and C3 position were determined using the NOE difference spectra (**Scheme S1**).

For the stereochemistry of the **3c** series compounds, the coupling constants between  $H_{6a}$  and  $H_{3a}$  ( $J_{H6a, H3a} = 4.9 - 5.6$  Hz) manifested convincingly that the fused ring system have a *cis*-bicyclic configuration. The stereochemistry of C3 position was determined by coupling constants between  $H_{3a}$  and  $H_3$  ( $J_{H3, H3a} = 9.1 - 10.0$  Hz), which demonstrated the *cis*- correlation between them (Proton proton coupling constants in a *bis*-THF system:  $J_{H3, H3a} > 7.0$  Hz for a *cis*-stereochemistry,  $J_{H3, H3a} = 0$  Hz for a *trans*-stereochemistry,<sup>1</sup> The NOE between  $H_3$  and  $H_4$  further confirmed the *cis*-stereochemistry between  $H_3$  and  $H_4$  and  $H_{3a}$ . The stereochemistry of C2 was determined by NOE between  $H_{ar1}$ ,  $H_{ar1'}$  and  $H_3$ , the correlation signal between  $H_3$  and  $H_{ar1}$ ,  $H_{ar1'}$  manifested the *cis*-relation of among them.<sup>2</sup>

**Scheme S1 Key NOEs of Perhydrofuro[2,3-*b*]pyran Derivatives.**

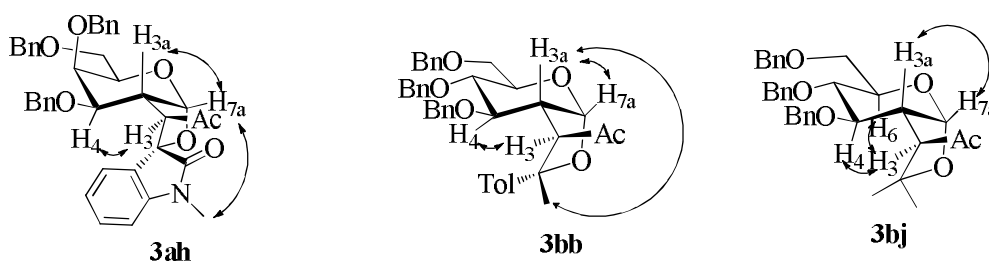

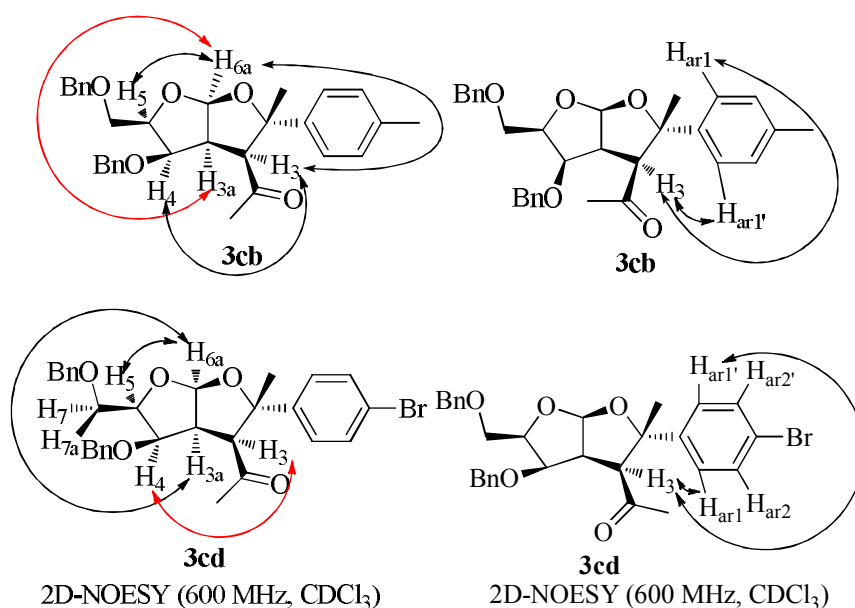

## References:

- 1: (a) L. Bueno-Perez, J. Li, D. D. Lantvit, L. Pan, T. N. Ninh, H. B. Chai, D. D. Soejarto, S. M. Swanson, D. M. Lucas and A. D. Kinghorn, *J. Nat. Prod.*, 2013, **76**, 1498; (b) M. C. Pirrung, and Y. R. Lee, *J. Am. Chem. Soc.*, 1995, **117**, 4814. (c) L. C. Chang, D. Chávez, L. L. Song, N. R. Farnsworth, J. M. Pezzuto and A. D. Kinghorn, *Org. Lett.*, 2000, **2**, 515; (d) A. M. Abou-Douh, C. Ito, R. A. Toscano, N. Y. El-Baga, E. A. El-Khrisy and H. Furukawa, *Zeitschrift für Naturforschung B*, 2005, **60**, 458; (e) E. V. Rao and N. R. Raju, *Phytochemistry*, 1984, **23**, 2339; (f) V. Lucchini, M. Prato, G. Scorrano, M. Stivanello and G. Valle, *J. Chem. Soc., Perkin Trans.*, 2, 1992, 259. (g) A. K. Ghosh, C. X. Xu, K. V. Rao, A. Baldrige, J. Agniswamy, Y. F. Wang and H. Mitsuya, *ChemMedChem*, 2010, **5**, 1850.
2. (a) F. Alonso, M. Rodríguez - Fernández, D. Sánchez, M. Yus, *Eur. J. Org. Chem.*, 2011, 6459; (b) F. Alonso, M. Rodriguez-Fernandez, D. Sanchez, M. Yus, *Synthesis*, 2010, 3013.
